# Supplementary material for: Investigation of the Role of Campylobacter Infection in Suspected Acute Polyradiculoneuritis in Dogs
Source: PubMed Central journal article supplement — J Vet Intern Med. 2018 Jan 22;32(1):352–60. doi: 10.1111/jvim.15030 (PMC5787210; doi:10.1111/jvim.15030), 2018-01-22
Supplement: JVIM-32-352-s002.pdf [file JVIM-32-352-s002.pdf]

**Document S2:** Owner's questionnaires for acute polyradiculoneuritis (APN) group in order to collect data relative to the patient's environment, way of living and natural course of the disease.

**Idiopathic Polyradiculoneuritis in Victoria –  
The Project:  
Questionnaire for Owners (AFFECTED dogs)**

Patient ID

**A - Patient's environment and way of living**

1. Where does your dog usually live (address)?

---

---

2. How would you describe the general location where your dog spends most of its time?

- a) Urban (city, no surrounding farmland within 15 minutes walk, no livestock)
- b) Sub-urban (mostly housing, farm/bush land within 15 minutes walk)
- c) Rural (On farm, or extensive farmland/bush within 15 minutes walk)

3. Does your dog come into contact with any water sources, such as: streams, ponds, and/or stagnant water?

- a) Yes, frequently.
- b) Rarely, occasionally.
- c) Never.

4. Is your dog indoors, outdoors or both?

- a) Primarily outside (stays outside most of the day, sleeps outside +/- in a kennel)
- b) Primarily indoors during the day, sleeps indoors, goes outside for walks, play and toileting.
- c) Mixture- outdoors during the day and indoors at night.

5. Do you own any other pets? If so, what are they and how many of each do you own? Please include pet sheep, waterfowl, chickens, wildlife etc.

---

---

---

---

---

6. Do you use any insecticides or weed killers in or around the area in which you animals live? Please list brand/active ingredients, and how regularly you use them.

---

---

---

---

7. What does your dog usually eat (please describe in detail) how often does it get fed, please include all treats?

---

---

---

---

---

8. Did you feed your dog any form of **raw** meat (mince, chicken necks, carrion), prior to the condition starting? Please outline the following next to the type of meat: what type/how often/where from (supermarket/butcher etc)/how was the meat stored (freezer, fridge).

---

---

---

---

9. Did you feed your dog any form of **cooked** meat (mince, chicken necks, carrion), prior to the condition starting? Please outline the following next to the type of meat: what type/how often/where from (supermarket/butcher etc)/how was the meat stored (freezer, fridge).

---

---

---

---

10. Do you feed your dog meat regularly? Y  N  Was it just prior to the disease? Y  N

11. Did you feed your dog anything unusual 7 days before you started to notice signs of the condition? What was this?

---

---

---

---

---

12. Does your dog tend to scavenge for food?

- a) Yes often
- b) Occasionally
- c) Rarely

13. If he/she scavenges do you recall if there was a scavenging incident prior to this episode (within 7 days)?

---

---

---

14. Does your dog eat any kind of poo (dog, chicken, horse, cat, etc) if yes what type, and how often?

---

---

15. Is your dog vaccinated/immunized?

Yes  No

16. If yes , could you please provide the dates and names of the vaccines used for the last 3 vaccinations?

---

---

---

---

---

---

**B- Natural course of the disease**

1. What time of the year was it?

---

a) Date when you noticed the condition started:

---

b) Date when your dog was not able to walk (3 steps or less without assistance):

---

c) Date when your dog was able to walk again (even if not perfect) = more than 3 steps without assistance:

---

d) Date when your dog reached a plateau (best clinical improvement):

---

At this time, was it back to normal?    Yes             No

If not, give a percentage: \_\_\_\_\_ %

2. If your dog has reached a plateau now: does he/she have some side remnants from the disease (stiffness, mild weakness etc...) explain?

---

---

---

---

3. Have there been any other relapses, if so please give details?

---

---

---

---

4. Was the dog euthanized directly or indirectly because of the disease?

Yes  No

If yes be precise?

---

---

5. Of the nursing car, what was the most difficult part that you encountered?

---

---

---

---

---

---

---

---

6. What was the most difficult aspect of recovery process, please give details?

---

---

---

---

---

---

---

---

7. Knowing what you know now, and what eventual outcome would be, would you have opted to go through the process again? Please explain.

---

---

---

---

**C- Epidemiologic analysis**

1. Breed: \_\_\_\_\_

2. Weight: \_\_\_\_\_

3. Gender: \_\_\_\_\_

4. Age: \_\_\_\_\_
