# Supplementary material for: Investigation of the Role of Campylobacter Infection in Suspected Acute Polyradiculoneuritis in Dogs
Source: PubMed Central journal article supplement — J Vet Intern Med. 2018 Jan 22;32(1):352–60. doi: 10.1111/jvim.15030 (PMC5787210; doi:10.1111/jvim.15030), 2018-01-22
Supplement: JVIM-32-352-s004.pdf [file JVIM-32-352-s004.pdf]

**Table S4: Multivariable exact logistic regression outputs with APN case status as the outcome variable, in a case-control study of 27 APN dogs and 47 control dogs from March 2015 to February 2017 in Australia.**

| Explanatory variable          | Odds ratio (OR) | SE(OR) | 95% CI     | P-value |
|-------------------------------|-----------------|--------|------------|---------|
| <i>Campylobacter spp.</i> +ve | 5.57            | 4.57   | 0.91, 42.9 | 0.068   |
| <7days <sup>†</sup>           |                 |        |            |         |
| Raw chicken in diet           | 39.7*           | Undef. | 5.84, ∞    | <0.001  |

\* median unbiased estimate (owing to zero cell counts)

<sup>†</sup> APN cases where sample was collected within 7 days from onset of clinical signs.

Undef. = undefined
