# Supplementary material for: Investigation of the Role of Campylobacter Infection in Suspected Acute Polyradiculoneuritis in Dogs
Source: PubMed Central journal article supplement — J Vet Intern Med. 2018 Jan 22;32(1):352–60. doi: 10.1111/jvim.15030 (PMC5787210; doi:10.1111/jvim.15030), 2018-01-22
Supplement: JVIM-32-352-s005.pdf [file JVIM-32-352-s005.pdf]

**Table S5: Univariable exact logistic regression outputs with *Campylobacter spp.* positivity as the outcome variable, in a case-control study of 27 APN dogs and 47 control dogs from March 2015 to February 2017 in Australia.**

| Model                                | Explanatory variable | Odds ratio<br>(OR) | SE(OR) | 95% CI     | P-value |
|--------------------------------------|----------------------|--------------------|--------|------------|---------|
| 1: Unadjusted                        | Raw chicken in diet  | 5.57               | 2.92   | 1.54, 19.2 | 0.005   |
| 2: Adjusting for case-control status | Raw chicken in diet  | 1.97               | 1.44   | 0.34, 10.4 | 0.57    |
